# Supplementary material
Source: MDPI journal article supplement (https://www.mdpi.com/2073-4395/12/12/3055)
Supplement: s1 [file s1]

# Predicted Soil Greenhouse Gas Emissions from Climate × Management Interactions in Temperate Grassland

Arlete S. Barneze <sup>1,2,3,\*</sup>, Mohamed Abdalla <sup>4</sup>, Jeanette Whitaker <sup>2</sup>, Niall P. McNamara <sup>2</sup> and Nicholas J. Ostle <sup>1</sup>

<sup>1</sup> Lancaster Environment Centre, Lancaster University, Lancaster LA1 4YQ, UK

<sup>2</sup> UK Centre for Ecology & Hydrology, Lancaster Environment Centre, Library Avenue, Bailrigg, Lancaster LA1 4AP, UK

<sup>3</sup> Soil Biology Group, Wageningen University & Research, P.O. Box 47, 6700 AA Wageningen, The Netherlands

<sup>4</sup> Institute of Biological and Environmental Sciences, School of Biological Sciences, University of Aberdeen, 23 St. Machar Drive, Aberdeen AB24 3UU, UK

\* Correspondence: arletesb@gmail.com; Tel.: +44-07817209468

**Figure S1** Measured (filled circle) and simulated (solid line) N<sub>2</sub>O, CO<sub>2</sub> and CH<sub>4</sub> emissions from soils of the control treatments from the growing season of 2015 and 2016. Error bars are standard deviations for 5 replicates.

**Figure S2** Measured (filled circle) and simulated (solid line) N<sub>2</sub>O, CO<sub>2</sub> and CH<sub>4</sub> emissions from soils of the interaction between nitrogen and cutting treatment from the growing season of 2015 and 2016. Error bars are standard deviations for 5 replicates.

**Figure S3** Measured (filled circle) and simulated (solid line) N<sub>2</sub>O, CO<sub>2</sub> and CH<sub>4</sub> emissions from soils of the interaction between warming and cutting treatment from the growing season of 2015 and 2016. Error bars are standard deviations for 5 replicates

**Figure S4** Measured (filled circle) and simulated (solid line) N<sub>2</sub>O, CO<sub>2</sub> and CH<sub>4</sub> emissions from soils of the interaction between warming, cutting and nitrogen treatment from the growing season of 2015. Error bars are standard deviations for 5 replicates

**Table S1** Measured and DNDC-simulated WFPS (%) for the full factorial experiment over two growing seasons.

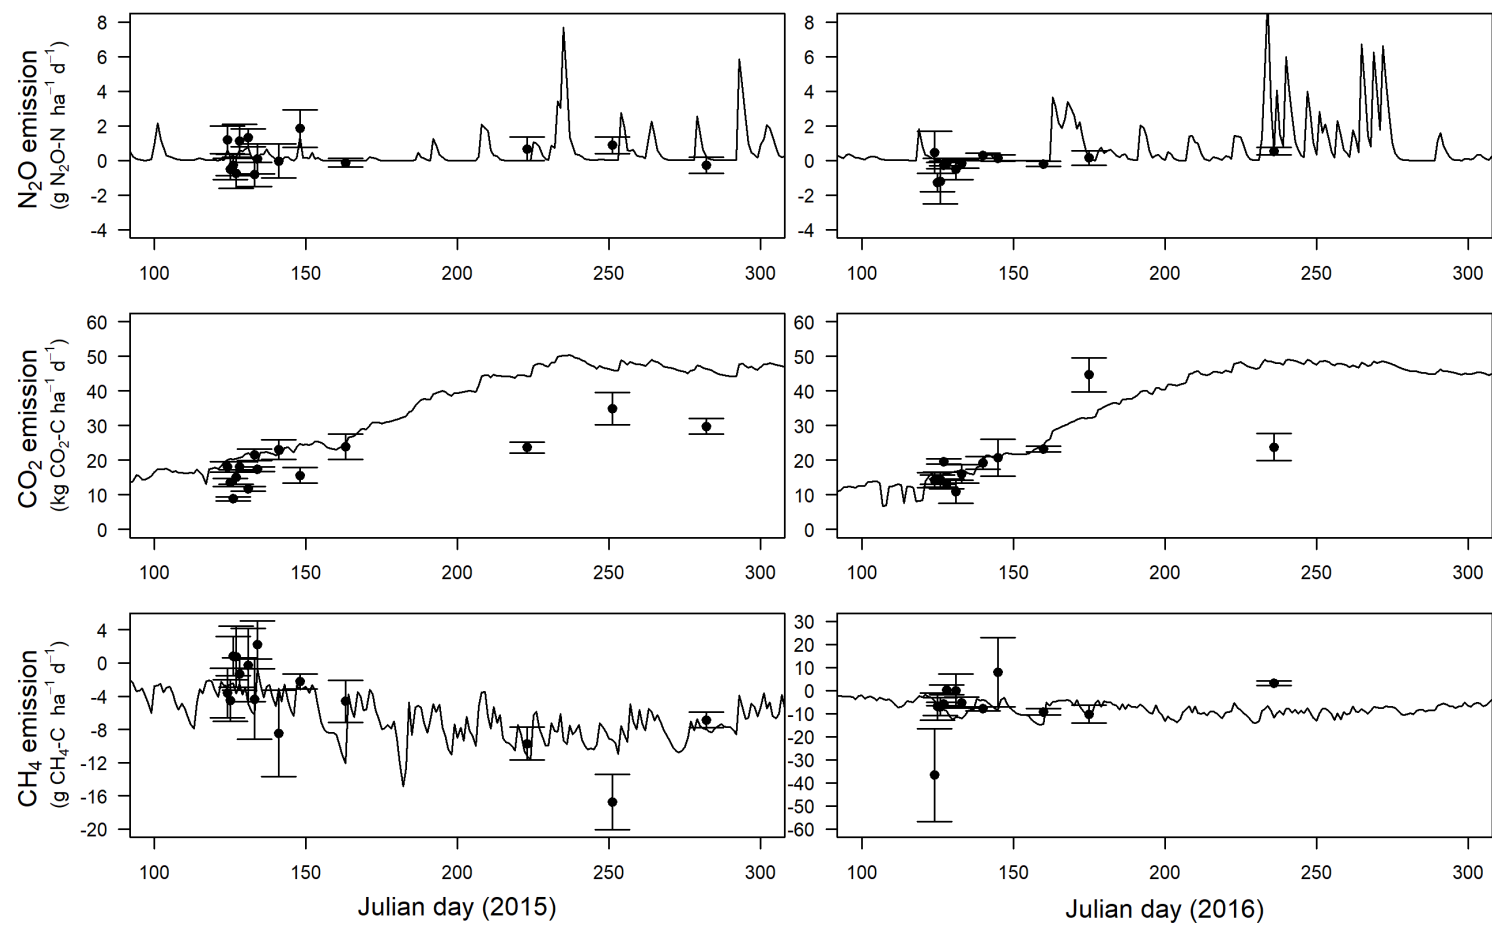

**Figure S1** Measured (filled circle) and simulated (solid line) N<sub>2</sub>O, CO<sub>2</sub> and CH<sub>4</sub> emissions from soils of the control treatments from the growing season of 2015 and 2016. Error bars are standard deviations for 5 replicates.

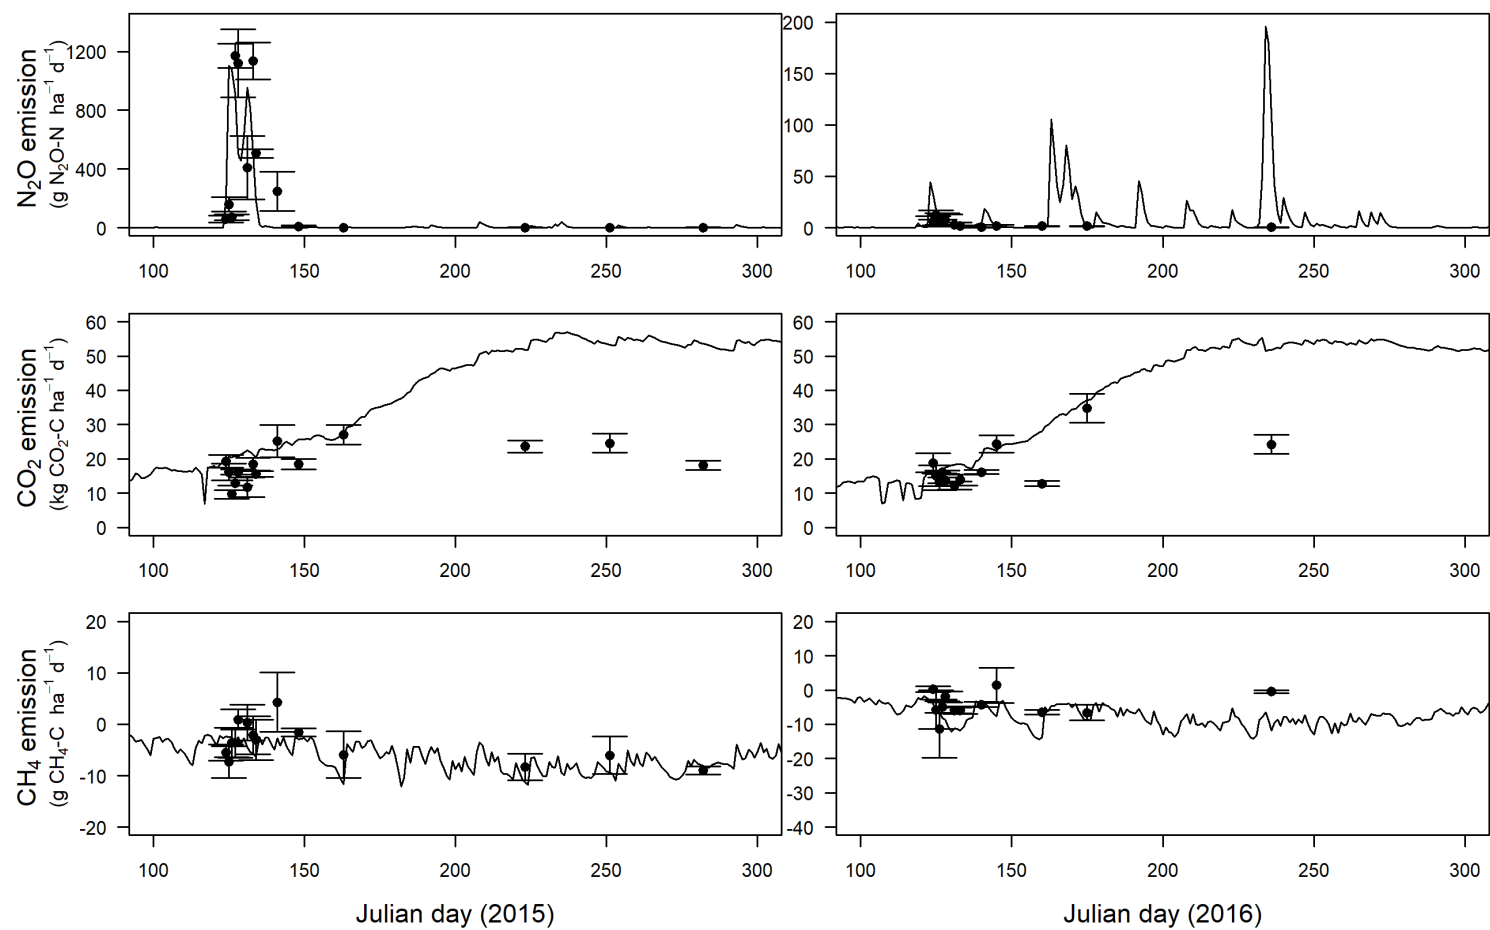

**Figure S2** Measured (filled circle) and simulated (solid line) N<sub>2</sub>O, CO<sub>2</sub> and CH<sub>4</sub> emissions from soils of the interaction between nitrogen and cutting treatment from the growing season of 2015 and 2016. Error bars are standard deviations for 5 replicates.

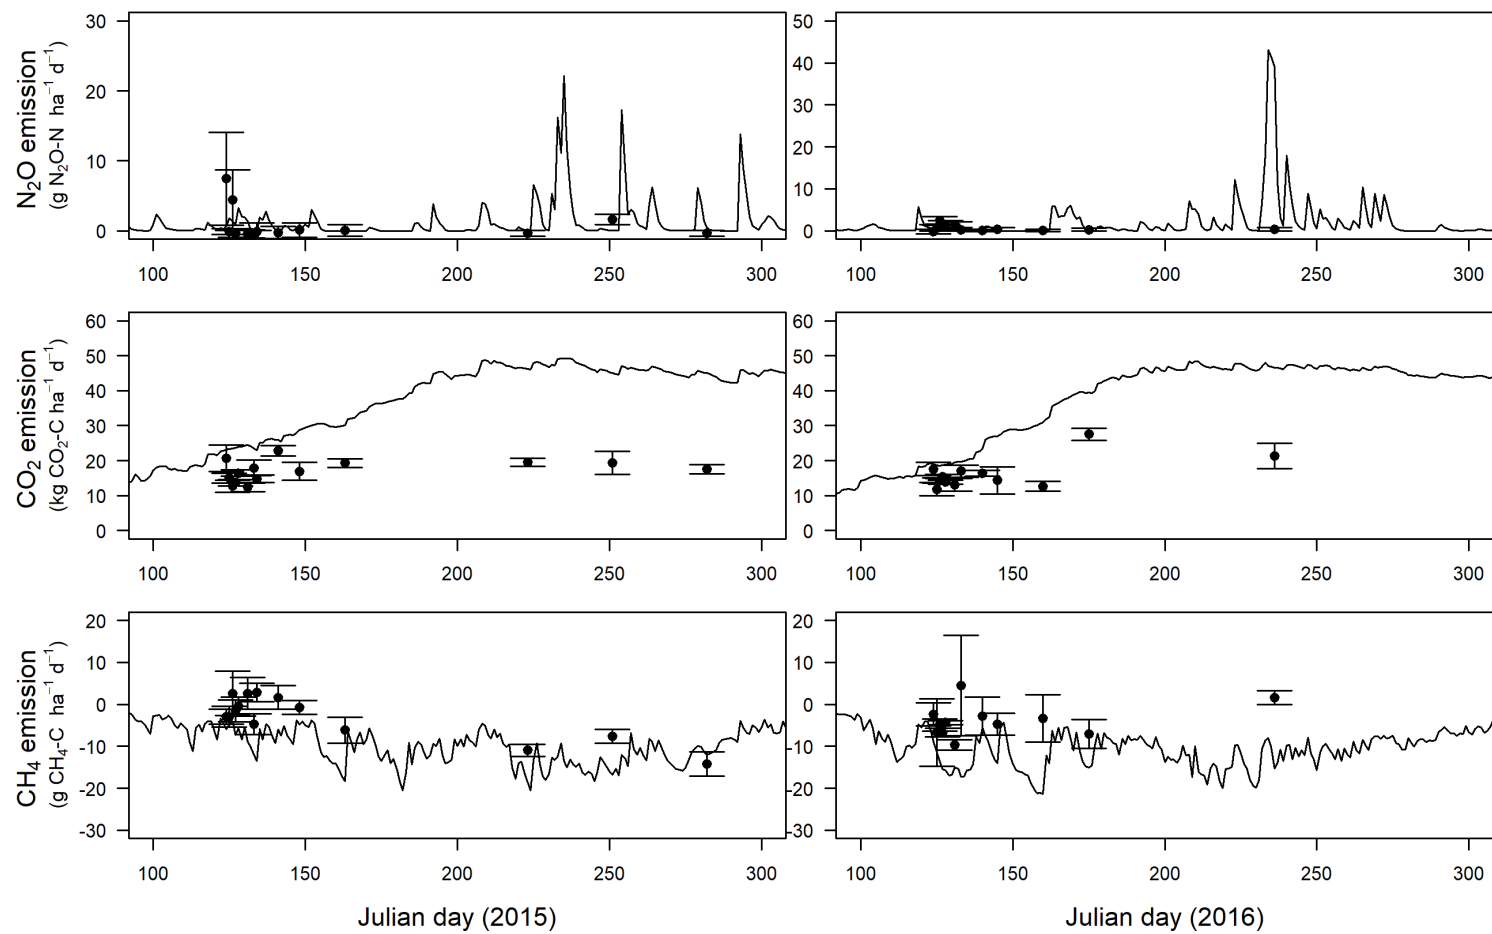

**Figure S3** Measured (filled circle) and simulated (solid line)  $\text{N}_2\text{O}$ ,  $\text{CO}_2$  and  $\text{CH}_4$  emissions from soils of the interaction between warming and cutting treatment from the growing season of 2015 and 2016. Error bars are standard deviations for 5 replicates.

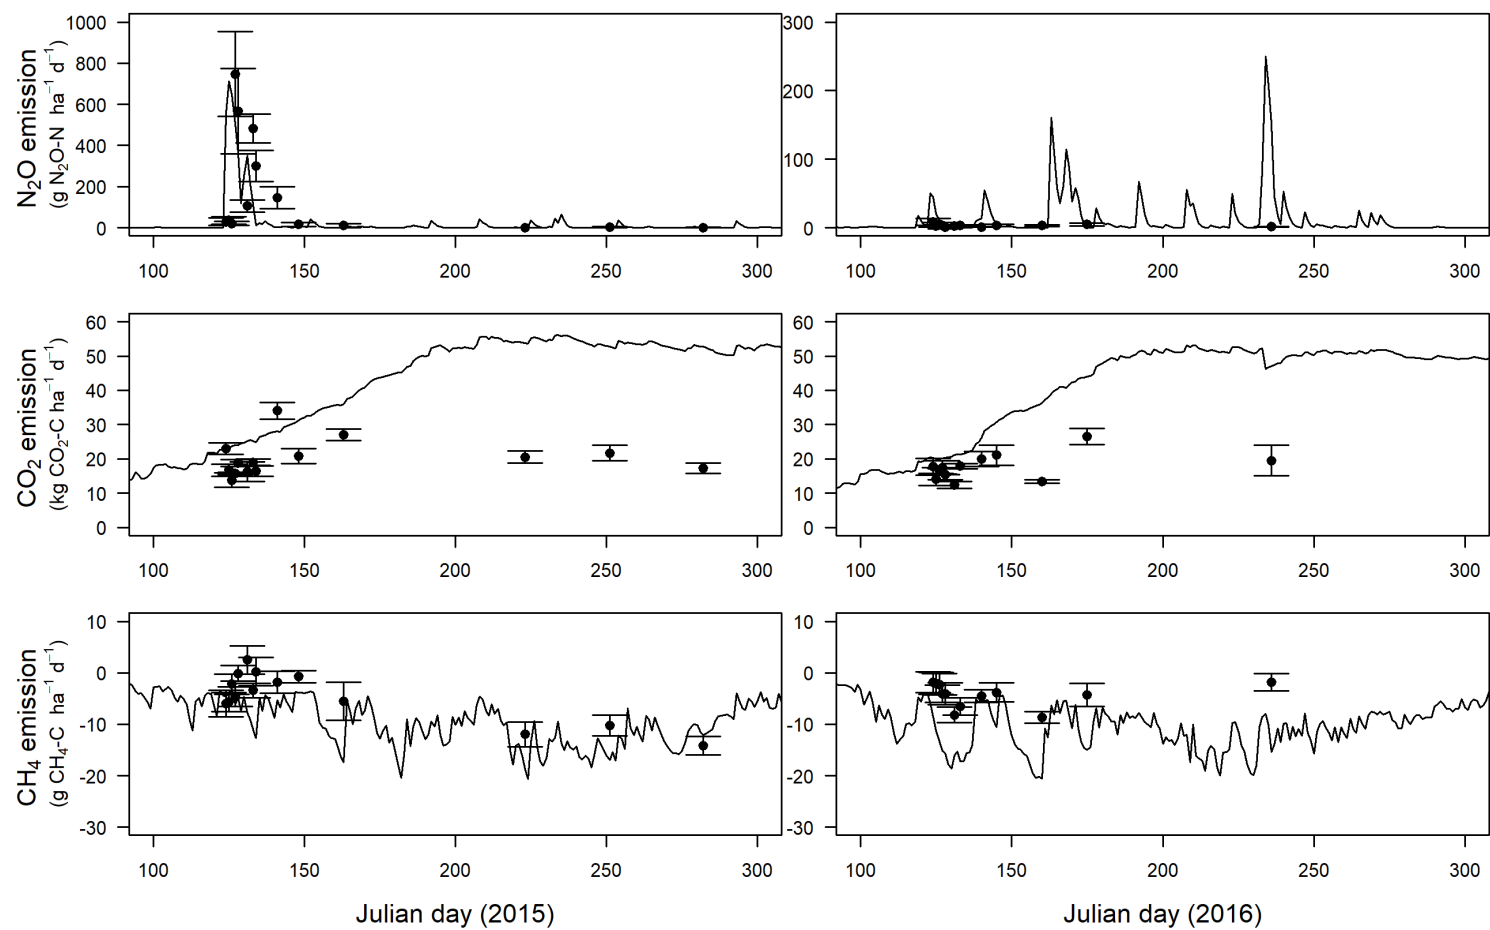

**Figure S4** Measured (filled circle) and simulated (solid line)  $\text{N}_2\text{O}$ ,  $\text{CO}_2$  and  $\text{CH}_4$  emissions from soils of the interaction between warming, cutting and nitrogen treatment from the growing season of 2015. Error bars are standard deviations for 5 replicates.

**Table S1** Measured and DNDC-simulated WFPS (%) for the full factorial experiment over two growing seasons.

| Treatments         | WFPS (%) |           |            | Relative deviation<br>between measured<br>and simulated WFPS<br>(%) |
|--------------------|----------|-----------|------------|---------------------------------------------------------------------|
|                    | Measured | Simulated | Difference |                                                                     |
| <i>2015 season</i> |          |           |            |                                                                     |
| Control            | 0.06     | 0.003     | 0.05       | 88                                                                  |
| Cutting (D)        | 0.06     | 0.003     | 0.05       | 88                                                                  |
| Warming (W)        | 0.05     | 0.003     | 0.04       | 90                                                                  |
| Nitrogen (N)       | 0.06     | 0.003     | 0.06       | 89                                                                  |
| N x W              | 0.05     | 0.003     | 0.05       | 89                                                                  |
| D x N              | 0.06     | 0.003     | 0.05       | 89                                                                  |
| D x W              | 0.06     | 0.003     | 0.06       | 88                                                                  |
| D x N x W          | 0.05     | 0.003     | 0.04       | 90                                                                  |
| <i>2016 season</i> |          |           |            |                                                                     |
| Control            | 0.04     | 0.008     | 0.03       | 91                                                                  |
| Cutting            | 0.04     | 0.009     | 0.03       | 90                                                                  |
| Warming            | 0.03     | 0.008     | 0.02       | 92                                                                  |
| Nitrogen           | 0.04     | 0.01      | 0.03       | 91                                                                  |
| N x W              | 0.04     | 0.009     | 0.03       | 92                                                                  |
| D x N              | 0.05     | 0.01      | 0.04       | 90                                                                  |
| D x W              | 0.04     | 0.008     | 0.03       | 91                                                                  |
| D x N x W          | 0.04     | 0.009     | 0.03       | 91                                                                  |
